# Supplementary material
Source: Elsevier journal article supplement (https://comptes-rendus.academie-sciences.fr/geoscience/article/10.1016/j.crte.2018.06.005/file/attach/mmc2.pdf)
Supplement: mmc2 [file mmc2.pdf]

**Supplementary table 1:** Settings for the instruments used in the geochronological Laboratory (GeoPlasmaLab Dresden) of the Senckenberg Naturhistorische Sammlungen Dresden, (Excimer Laser, ASI RESolution SE S155) and (ICP-MS, Thermo Fisher, Element 2 XR).

| <b>ICP-MS</b>                                 | Finnigan Element 2 XR                                                                                 |
|-----------------------------------------------|-------------------------------------------------------------------------------------------------------|
| Forward Power                                 | 1400 W                                                                                                |
| Gas flow rate                                 | 15.0 l min <sup>-1</sup> (plasma)<br>1.07 l min <sup>-1</sup> (aux)                                   |
| Scan mode                                     | E-scan                                                                                                |
| Scanned masses                                | 202, 204, 206, 207,<br>208, 232, 235, 238                                                             |
| Mass resolution                               | 300                                                                                                   |
| Dead time                                     | 18 ns                                                                                                 |
| Oxide UO <sup>+</sup> /U <sup>+</sup>         | < 1%                                                                                                  |
| Dwell time                                    | 4 ms                                                                                                  |
| Settling time                                 | ≤ 1 ms/amu                                                                                            |
| Number of scans                               | 1500                                                                                                  |
| Background                                    | 15 s                                                                                                  |
| Ablation time                                 | 30 s                                                                                                  |
| Integration time                              | 1.4 s (=25 scans)                                                                                     |
| <b>Laser system</b>                           | ASI RESolution<br>SE S155, excimer                                                                    |
| Nominal spot diameter                         | 35 μm (unknowns)<br>35 μm (standards)                                                                 |
| Carrier gas                                   | 0.06 l min <sup>-1</sup> N <sub>2</sub><br>0.56 l min <sup>-1</sup> He<br>0.83 l min <sup>-1</sup> Ar |
| Laser settings                                | 6 Hz, 5 mJ, 1.8-2.1 J · cm <sup>-2</sup>                                                              |
| Drill speed (DS) /<br>Raster scan speed (RSS) | ~ 0.5 μm/s (DS)                                                                                       |
| Effective cell volume                         | c. 1 cm <sup>3</sup>                                                                                  |
| Sensitivity (GJ-1)                            | 6 · 10 <sup>6</sup> counts/pg U                                                                       |
